# Supplementary material
Source: PubMed Central journal article supplement (PMC2706379)
Supplement: 251_2009_384_MOESM1_ESM.pdf [file 251_2009_384_MOESM1_ESM.pdf]

| Chromosome | Gene number | V exon     |          | Strand  | Functional /<br>Pseudo gene | Subgroup |
|------------|-------------|------------|----------|---------|-----------------------------|----------|
|            |             | Start (bp) | End (bp) |         |                             |          |
| Chr:10     |             |            |          |         |                             |          |
|            | BoTRDV4     | 22674602   | 22674883 | forward | Functional                  | BoTRDV4  |
|            | 1           | 22948572   | 22948841 | reverse | Pseudo                      | BoTRDV1  |
|            | 2           | 22960242   | 22960511 | reverse | Functional                  | HuTRAV23 |
|            | 3           | 22971708   | 22971980 | reverse | Functional                  | BoTRDV1  |
|            | 4           | 22978602   | 22978868 | reverse | Pseudo                      | HuTRAV25 |
|            | 5           | 22990945   | 22991211 | reverse | Functional                  | HuTRAV26 |
|            | BoTRDV1.35  | 23002326   | 23002571 | reverse | Functional                  | BoTRDV1  |
|            | 6           | 23007414   | 23007686 | reverse | Pseudo                      | HuTRAV23 |
|            | 7           | 23014345   | 23014608 | reverse | Functional                  | HuTRAV22 |
|            | 8           | 23029897   | 23030175 | reverse | Functional                  | BoTRDV1  |
|            | 9           | 23045197   | 23045463 | reverse | Functional                  | HuTRAV39 |
|            | 10          | 23060280   | 23060555 | reverse | Functional                  | HuTRAV38 |
|            | 11          | 23066986   | 23067261 | reverse | Functional                  | HuTRAV38 |
|            | 12          | 23075056   | 23075331 | reverse | Functional                  | HuTRAV38 |
|            | 13          | 23077936   | 23078211 | reverse | Functional                  | HuTRAV38 |
|            | 14          | 23117306   | 23117581 | reverse | Pseudo                      | HuTRAV36 |
|            | 15          | 23123318   | 23123584 | reverse | Functional                  | HuTRAV35 |
|            | BoTRDV2.1   | 23137927   | 23138199 | reverse | Functional                  | BoTRDV2  |
|            | 16          | 23141594   | 23141866 | reverse | Functional                  | HuTRAV29 |
|            | 17          | 23147596   | 23147856 | reverse | Functional                  | HuTRAV28 |
|            | 18          | 23161844   | 23162077 | reverse | Pseudo                      | HuTRAV26 |
|            | 19          | 23181529   | 23181798 | reverse | Functional                  | HuTRAV29 |
|            | 20          | 23191234   | 23191494 | reverse | Functional                  | HuTRAV28 |
|            | 21          | 23201136   | 23201402 | reverse | Functional                  | HuTRAV27 |
|            | 22          | 23233642   | 23233917 | reverse | Pseudo                      | HuTRAV36 |
|            | BoTRDV3.1   | 23247183   | 23247455 | reverse | Functional                  | BoTRDV3  |
|            | 23          | 23278921   | 23279181 | reverse | Functional                  | HuTRAV41 |
|            | 24          | 23301088   | 23301357 | reverse | Functional                  | HuTRAV39 |
|            | 25          | 23319197   | 23319475 | reverse | Functional                  | HuTRAV38 |
|            | 26          | 23330644   | 23330898 | reverse | Pseudo                      | HuTRAV8  |
|            | 27          | 23340024   | 23340279 | forward | Functional                  | HuTRAV22 |
|            | 28          | 23351878   | 23352144 | reverse | Functional                  | HuTRAV26 |
|            | 29          | 23359472   | 23359738 | reverse | Functional                  | HuTRAV25 |
|            | 30          | 23369978   | 23370256 | reverse | Functional                  | BoTRDV1  |
|            | 31          | 23381640   | 23381894 | reverse | Functional                  | HuTRAV22 |
|            | 32          | 23393275   | 23393556 | reverse | Functional                  | BoTRDV1  |
|            | 33          | 23403007   | 23403273 | reverse | Functional                  | HuTRAV26 |
|            | 34          | 23410208   | 23410480 | reverse | Functional                  | BoTRDV1  |
|            | 35          | 23438409   | 23438678 | reverse | Pseudo                      | HuTRAV25 |
|            | 36          | 23452123   | 23452392 | reverse | Functional                  | HuTRAV24 |
|            | 37          | 23461926   | 23462196 | reverse | Functional                  | BoTRDV1  |
|            | 38          | 23473539   | 23473805 | reverse | Functional                  | HuTRAV26 |
|            | 39          | 23483563   | 23483832 | reverse | Functional                  | HuTRAV23 |
|            | 40          | 23484759   | 23485019 | reverse | Functional                  | HuTRAV22 |
|            | 41          | 23487777   | 23488043 | reverse | Functional                  | HuTRAV26 |
|            | 42          | 23501788   | 23502060 | reverse | Functional                  | BoTRDV1  |
|            | 43          | 23508212   | 23508478 | reverse | Pseudo                      | HuTRAV25 |
|            | 44          | 23512266   | 23512535 | reverse | Functional                  | HuTRAV24 |
|            | 45          | 23518481   | 23518756 | reverse | Functional                  | BoTRDV1  |
|            | 46          | 23525021   | 23525310 | reverse | Pseudo                      | BoTRDV1  |
|            | 47          | 23534850   | 23535116 | reverse | Functional                  | HuTRAV26 |
|            | 48          | 23546671   | 23546928 | reverse | Functional                  | HuTRAV20 |
|            | 49          | 23555171   | 23555446 | reverse | Functional                  | HuTRAV19 |

| Chromosome    | Gene number | V exon     |          | Strand  | Functional /<br>Pseudo gene | Subgroup         |
|---------------|-------------|------------|----------|---------|-----------------------------|------------------|
|               |             | Start (bp) | End (bp) |         |                             |                  |
| <b>Chr:10</b> |             |            |          |         |                             |                  |
|               | 50          | 23557355   | 23557627 | reverse | Functional                  | Gene 50 subgroup |
|               | 51          | 23564388   | 23564660 | reverse | Functional                  | Gene 50 subgroup |
|               | 52          | 23586410   | 23586682 | reverse | Functional                  | Gene 50 subgroup |
|               | 53          | 23590584   | 23590850 | reverse | Functional                  | HuTRAV18         |
|               | 54          | 23607399   | 23607665 | reverse | Functional                  | Gene 54 subgroup |
|               | 55          | 23617675   | 23617941 | reverse | Functional                  | Gene 54 subgroup |
|               | 56          | 23627869   | 23628138 | reverse | Functional                  | HuTRAV11         |
|               | 57          | 23629093   | 23629356 | reverse | Pseudo                      | Gene 57 subgroup |
|               | 58          | 23634707   | 23634976 | reverse | Functional                  | HuTRAV13         |
|               | 59          | 23639386   | 23639655 | reverse | Functional                  | HuTRAV9          |
|               | 60          | 23643039   | 23643308 | reverse | Functional                  | HuTRAV13         |
|               | 61          | 23648519   | 23648788 | reverse | Functional                  | HuTRAV13         |
|               | 62          | 23653202   | 23653471 | reverse | Functional                  | HuTRAV9          |
|               | 63          | 23655291   | 23655560 | forward | Functional                  | HuTRAV9          |
|               | 64          | 23662648   | 23662920 | reverse | Functional                  | HuTRAV8          |
|               | 65          | 23678122   | 23678379 | reverse | Pseudo                      | HuTRAV26         |
|               | 66          | 23696670   | 23696948 | reverse | Functional                  | BoTRDV1          |
|               | 67          | 23702747   | 23703016 | reverse | Pseudo                      | HuTRAV23         |
|               | 68          | 23709912   | 23710172 | reverse | Functional                  | HuTRAV22         |
|               | 69          | 23714348   | 23714620 | reverse | Functional                  | HuTRAV8          |
|               | 70          | 23722752   | 23723021 | reverse | Functional                  | HuTRAV21         |
|               | 71          | 23734080   | 23734337 | reverse | Pseudo                      | HuTRAV18         |
|               | 72          | 23745366   | 23745635 | reverse | Functional                  | HuTRAV17         |
|               | 73          | 23752350   | 23752610 | reverse | Functional                  | HuTRAV16         |
|               | 74          | 23771376   | 23771648 | reverse | Functional                  | Gene 50 subgroup |
|               | 75          | 23775527   | 23775796 | reverse | Functional                  | HuTRAV18         |
|               | 76          | 23792382   | 23792648 | reverse | Functional                  | Gene 54 subgroup |
|               | 77          | 23802204   | 23802473 | reverse | Functional                  | HuTRAV11         |
|               | 78          | 23803714   | 23803983 | reverse | Functional                  | HuTRAV10         |
|               | 79          | 23811357   | 23811617 | reverse | Pseudo                      | HuTRAV9          |
|               | 80          | 23820934   | 23821209 | reverse | Functional                  | HuTRAV14         |
|               | 81          | 23824646   | 23824915 | reverse | Pseudo                      | HuTRAV13         |
|               | 82          | 23826354   | 23826614 | reverse | Functional                  | Gene 82 subgroup |
|               | 83          | 23831505   | 23831774 | reverse | Functional                  | HuTRAV9          |
|               | 84          | 23848800   | 23849075 | reverse | Functional                  | HuTRAV14         |
|               | 85          | 23854204   | 23854473 | reverse | Functional                  | HuTRAV13         |
|               | 86          | 23858772   | 23859041 | reverse | Functional                  | HuTRAV9          |
|               | 87          | 23875815   | 23876084 | reverse | Functional                  | HuTRAV5          |
|               | 88          | 23886979   | 23887245 | reverse | Functional                  | HuTRAV4          |
|               | 89          | 23892329   | 23892607 | reverse | Functional                  | BoTRDV1          |
|               | 90          | 23902832   | 23903125 | reverse | Functional                  | HuTRAV22         |
|               | 91          | 23909328   | 23909603 | reverse | Pseudo                      | HuTRAV26         |
|               | 92          | 23918916   | 23919188 | reverse | Functional                  | BoTRDV1          |
|               | 93          | 23975327   | 23975596 | forward | Functional                  | HuTRAV23         |
|               | 94          | 23981317   | 23981595 | forward | Functional                  | BoTRDV1          |
|               | 95          | 23993347   | 23993613 | forward | Functional                  | HuTRAV26         |
|               | BoTRDV1.29  | 24003824   | 24004096 | forward | Functional                  | BoTRDV1          |
|               | 96          | 24020782   | 24021051 | reverse | Pseudo                      | Gene 96 subgroup |
|               | 97          | 24026055   | 24026327 | forward | Functional                  | BoTRDV1          |
|               | 98          | 24031005   | 24031274 | forward | Pseudo                      | HuTRAV24         |
|               | 99          | 24037403   | 24037669 | forward | Pseudo                      | HuTRAV25         |
|               | 100         | 24044425   | 24044700 | forward | Functional                  | BoTRDV1          |
|               | 101         | 24058367   | 24058636 | forward | Functional                  | HuTRAV5          |

| Chromosome | Gene number | V exon     |          | Strand  | Functional /<br>Pseudo gene | Subgroup         |
|------------|-------------|------------|----------|---------|-----------------------------|------------------|
|            |             | Start (bp) | End (bp) |         |                             |                  |
| Chr:10     |             |            |          |         |                             |                  |
|            | 102         | 24075405   | 24075674 | forward | Functional                  | HuTRAV9          |
|            | 103         | 24079974   | 24080243 | forward | Functional                  | HuTRAV13         |
|            | 104         | 24085370   | 24085645 | forward | Functional                  | HuTRAV14         |
|            | 105         | 24102655   | 24102924 | forward | Functional                  | HuTRAV9          |
|            | 106         | 24107797   | 24108057 | forward | Functional                  | Gene 82 subgroup |
|            | 107         | 24109490   | 24109759 | forward | Pseudo                      | HuTRAV13         |
|            | 108         | 24113191   | 24113466 | forward | Functional                  | HuTRAV14         |
|            | 109         | 24121401   | 24121673 | forward | Pseudo                      | HuTRAV9          |
|            | 110         | 24126500   | 24126781 | forward | Functional                  | HuTRAV10         |
|            | 111         | 24137674   | 24137940 | forward | Functional                  | Gene 54 subgroup |
|            | 112         | 24147698   | 24147967 | forward | Functional                  | HuTRAV17         |
|            | 113         | 24159350   | 24159619 | forward | Functional                  | HuTRAV18         |
|            | 114         | 24164829   | 24165101 | forward | Functional                  | Gene 50 subgroup |
|            | 115         | 24170840   | 24171112 | forward | Functional                  | Gene 50 subgroup |
|            | 116         | 24182428   | 24182700 | forward | Functional                  | Gene 50 subgroup |
|            | 117         | 24205025   | 24205294 | forward | Pseudo                      | HuTRAV23         |
|            | 118         | 24211104   | 24211382 | forward | Functional                  | BoTRDV1          |
|            | 119         | 24217885   | 24218151 | forward | Functional                  | HuTRAV25         |
|            | 120         | 24224898   | 24225164 | forward | Functional                  | HuTRAV26         |
|            | 121         | 24227964   | 24228224 | forward | Functional                  | HuTRAV22         |
|            | 122         | 24233463   | 24233741 | forward | Pseudo                      | BoTRDV1          |
|            | 123         | 24244616   | 24244882 | forward | Functional                  | HuTRAV25         |
|            | 124         | 24312741   | 24313016 | reverse | Functional                  | HuTRAV14         |
|            | 125         | 24316448   | 24316717 | reverse | Pseudo                      | HuTRAV13         |
|            | 126         | 24318150   | 24318410 | reverse | Functional                  | Gene 82 subgroup |
|            | 127         | 24323269   | 24323541 | reverse | Pseudo                      | HuTRAV9          |
|            | 128         | 24332177   | 24332446 | reverse | Functional                  | HuTRAV5          |
|            | 129         | 24346461   | 24346727 | forward | Functional                  | HuTRAV26         |
|            | 130         | 24360789   | 24361064 | forward | Functional                  | BoTRDV1          |
|            | 131         | 24373411   | 24373683 | forward | Functional                  | BoTRDV1          |
|            | 132         | 24379513   | 24379782 | forward | Pseudo                      | HuTRAV24         |
|            | 133         | 24385905   | 24386171 | forward | Pseudo                      | HuTRAV25         |
|            | 134         | 24392959   | 24393234 | forward | Functional                  | BoTRDV1          |
|            | 135         | 24411148   | 24411414 | forward | Functional                  | HuTRAV26         |
|            | 136         | 24414214   | 24414474 | forward | Functional                  | HuTRAV22         |
|            | 137         | 24419724   | 24420002 | forward | Pseudo                      | BoTRDV1          |
|            | 138         | 24428704   | 24428982 | reverse | Functional                  | BoTRDV1          |
|            | 139         | 24439854   | 24440117 | reverse | Functional                  | HuTRAV22         |
|            | 140         | 24445265   | 24445543 | reverse | Pseudo                      | BoTRDV1          |
|            | 141         | 24454834   | 24455103 | reverse | Pseudo                      | HuTRAV23         |
|            | 142         | 24466776   | 24467021 | forward | Functional                  | BoTRDV1          |
|            | 143         | 24481798   | 24482064 | forward | Functional                  | HuTRAV26         |
|            | 144         | 24493157   | 24493429 | forward | Functional                  | BoTRDV1          |
|            | 145         | 24505776   | 24506048 | forward | Functional                  | BoTRDV1          |
|            | 146         | 24511888   | 24512157 | forward | Functional                  | HuTRAV24         |
|            | 147         | 24518312   | 24518578 | forward | Functional                  | HuTRAV25         |
|            | 148         | 24524052   | 24524324 | forward | Functional                  | BoTRDV1          |
|            | 149         | 24531988   | 24532254 | forward | Functional                  | HuTRAV26         |
|            | 150         | 24541433   | 24541699 | forward | Functional                  | BoTRDV1          |
|            | 151         | 24552540   | 24552809 | forward | Pseudo                      | HuTRAV8          |
|            | 152         | 24553490   | 24553750 | forward | Functional                  | HuTRAV22         |
|            | 153         | 24606611   | 24606889 | reverse | Functional                  | BoTRDV1          |
|            | 154         | 24613215   | 24613475 | reverse | Functional                  | HuTRAV22         |

| Chromosome    | Gene number | V exon     |          | Strand  | Functional /<br>Pseudo gene | Subgroup         |
|---------------|-------------|------------|----------|---------|-----------------------------|------------------|
|               |             | Start (bp) | End (bp) |         |                             |                  |
| <b>Chr:10</b> |             |            |          |         |                             |                  |
|               | 155         | 24616237   | 24616503 | reverse | Functional                  | HuTRAV26         |
|               | 156         | 24630206   | 24630472 | reverse | Functional                  | HuTRAV25         |
|               | 157         | 24654033   | 24654314 | reverse | Functional                  | BoTRDV1          |
|               | 158         | 24660497   | 24660766 | reverse | Functional                  | HuTRAV23         |
|               | 159         | 24669506   | 24669766 | reverse | Functional                  | HuTRAV22         |
|               | 160         | 24673929   | 24674201 | reverse | Functional                  | HuTRAV8          |
|               | 161         | 24684028   | 24684297 | forward | Functional                  | HuTRAV21         |
|               | 162         | 24692068   | 24692325 | reverse | Functional                  | HuTRAV20         |
|               | 163         | 24700328   | 24700603 | reverse | Functional                  | HuTRAV19         |
|               | 164         | 24702523   | 24702795 | reverse | Functional                  | Gene 50 subgroup |
|               | 165         | 24711015   | 24711287 | reverse | Pseudo                      | Gene 50 subgroup |
|               | 166         | 24731010   | 24731282 | reverse | Functional                  | HuTRAV3          |
|               | 167         | 24736348   | 24736602 | reverse | Functional                  | HuTRAV2          |
|               | 168         | 24754771   | 24755043 | reverse | Functional                  | HuTRAV3          |
|               | 169         | 24763843   | 24764097 | reverse | Functional                  | HuTRAV2          |
|               | 170         | 24782304   | 24782576 | reverse | Functional                  | HuTRAV3          |
|               | 171         | 24789297   | 24789551 | reverse | Functional                  | HuTRAV2          |
|               | 172         | 24804286   | 24804558 | reverse | Functional                  | HuTRAV3          |
|               | 173         | 24811253   | 24811522 | reverse | Pseudo                      | HuTRAV2          |
|               | 174         | 24823012   | 24823281 | reverse | Pseudo                      | HuTRAV3          |
|               | 175         | 24830306   | 24830560 | reverse | Functional                  | HuTRAV2          |
|               | 176         | 24844991   | 24845263 | reverse | Functional                  | HuTRAV3          |
|               | 177         | 24851815   | 24852069 | reverse | Functional                  | HuTRAV2          |
|               | 178         | 24862162   | 24862434 | reverse | Functional                  | HuTRAV3          |
|               | 179         | 24869183   | 24869437 | reverse | Functional                  | HuTRAV2          |
|               | 180         | 24943043   | 24943309 | reverse | Functional                  | HuTRAV1          |

**Un.004.100**

|  |            |        |        |         |            |                   |
|--|------------|--------|--------|---------|------------|-------------------|
|  | 181        | 6091   | 6363   | reverse | Functional | BoTRDV1           |
|  | 182        | 12727  | 12993  | reverse | Functional | HuTRAV25          |
|  | 183        | 15954  | 16217  | reverse | Pseudo     | HuTRAV23          |
|  | 184        | 17149  | 17409  | reverse | Functional | HuTRAV22          |
|  | 185        | 20629  | 20883  | reverse | Functional | HuTRAV26          |
|  | 186        | 30297  | 30569  | reverse | Functional | BoTRDV1           |
|  | 187        | 36634  | 36900  | reverse | Functional | HuTRAV25          |
|  | 188        | 48649  | 48918  | reverse | Functional | HuTRAV21          |
|  | 189        | 56971  | 57234  | reverse | Functional | HuTRAV20          |
|  | 190        | 65304  | 65582  | reverse | Pseudo     | HuTRAV19          |
|  | 191        | 68870  | 69139  | reverse | Functional | Gene 50 subgroup  |
|  | 192        | 76467  | 76739  | reverse | Functional | Gene 50 subgroup  |
|  | 193        | 88332  | 88604  | reverse | Functional | Gene 50 subgroup  |
|  | 194        | 90348  | 90617  | reverse | Functional | HuTRAV18          |
|  | 195        | 111606 | 111872 | reverse | Functional | Gene 54 subgroup  |
|  | 196        | 124706 | 124954 | reverse | Pseudo     | Gene 196 subgroup |
|  | 197        | 126203 | 126469 | reverse | Functional | HuTRAV10          |
|  | 198        | 131241 | 131522 | reverse | Pseudo     | HuTRAV9           |
|  | 199        | 143265 | 143525 | reverse | Pseudo     | HuTRAV13          |
|  | 200        | 149377 | 149637 | reverse | Functional | Gene 82 subgroup  |
|  | 201        | 153365 | 153634 | reverse | Functional | HuTRAV9           |
|  | BoTRDV1.31 | 174874 | 175155 | reverse | Functional | BoTRDV1           |
|  | 202        | 180004 | 180302 | reverse | Pseudo     | HuTRAV23          |
|  | 203        | 202945 | 203205 | reverse | Functional | HuTRAV22          |
|  | 204        | 220769 | 221047 | reverse | Functional | BoTRDV1           |

| Chromosome         | Gene number      | V exon     |          | Strand  | Functional /<br>Pseudo gene | Subgroup         |
|--------------------|------------------|------------|----------|---------|-----------------------------|------------------|
|                    |                  | Start (bp) | End (bp) |         |                             |                  |
| <b>Un.004.100</b>  |                  |            |          |         |                             |                  |
|                    | 205              | 225526     | 225735   | reverse | Pseudo                      | HuTRAV23         |
|                    | 206              | 230830     | 231090   | reverse | Functional                  | HuTRAV22         |
|                    | 207              | 235454     | 235726   | reverse | Pseudo                      | HuTRAV24         |
|                    | BoTRDV1.32       | 240748     | 241026   | reverse | Functional                  | BoTRDV1          |
|                    | 208              | 247343     | 247603   | reverse | Functional                  | HuTRAV22         |
|                    | 209              | 250365     | 250631   | reverse | Functional                  | HuTRAV26         |
|                    | 210              | 257394     | 257660   | reverse | Functional                  | HuTRAV25         |
|                    | 211              | 264451     | 264729   | reverse | Functional                  | BoTRDV1          |
|                    | 212              | 289865     | 290137   | reverse | Functional                  | Gene 50 subgroup |
|                    | 214              | 301449     | 301721   | reverse | Functional                  | Gene 50 subgroup |
|                    | 215              | 316189     | 316455   | reverse | Functional                  | HuTRAV18         |
|                    | 216              | 329229     | 329495   | reverse | Pseudo                      | HuTRAV17         |
|                    | 217              | 335298     | 335558   | reverse | Functional                  | HuTRAV16         |
|                    | 218 <sup>a</sup> | 354053     | 354313   | reverse | Incomplete                  | Gene 54 subgroup |
| <b>Un.004.1011</b> |                  |            |          |         |                             |                  |
|                    | 219              | 1762       | 2022     | forward | Functional                  | HuTRAV28         |
|                    | 220              | 8047       | 8316     | forward | Functional                  | HuTRAV29         |
|                    | 221              | 11532      | 11804    | forward | Functional                  | BoTRDV2          |
| <b>Un.004.1195</b> |                  |            |          |         |                             |                  |
|                    | 222              | 5699       | 5971     | forward | Functional                  | HuTRAV8          |
|                    | 223              | 6822       | 7082     | forward | Pseudo                      | HuTRAV22         |
|                    | 224              | 10751      | 11017    | forward | Functional                  | BoTRDV1          |
|                    | 225              | 21771      | 22040    | forward | Pseudo                      | HuTRAV8          |
|                    | 226              | 22709      | 22969    | forward | Pseudo                      | HuTRAV22         |
|                    | 227              | 33963      | 34241    | forward | Functional                  | BoTRDV1          |
| <b>Un.004.1494</b> |                  |            |          |         |                             |                  |
|                    | 228              | 863        | 1135     | forward | Pseudo                      | HuTRAV24         |
|                    | 229              | 4941       | 5201     | forward | Functional                  | HuTRAV22         |
|                    | 230              | 10305      | 10565    | forward | Pseudo                      | HuTRAV23         |
|                    | 231              | 16538      | 16801    | reverse | Pseudo                      | HuTRAV23         |
|                    | 232              | 21800      | 22060    | reverse | Functional                  | HuTRAV22         |
|                    | 233              | 26410      | 26709    | reverse | Pseudo                      | HuTRAV24         |
|                    | 234              | 31705      | 31983    | reverse | Functional                  | BoTRDV1          |
| <b>Un.004.1854</b> |                  |            |          |         |                             |                  |
|                    | 235              | 9313       | 9582     | forward | Pseudo                      | HuTRAV23         |
|                    | 236              | 15447      | 15725    | forward | Functional                  | BoTRDV1          |
|                    | 237              | 22590      | 22856    | forward | Functional                  | HuTRAV25         |
| <b>Un.004.2118</b> |                  |            |          |         |                             |                  |
|                    | 238              | 7810       | 8079     | forward | Pseudo                      | HuTRAV8          |
|                    | 239              | 8756       | 9010     | forward | Functional                  | HuTRAV22         |
| <b>Un.004.2236</b> |                  |            |          |         |                             |                  |
|                    | 240              | 6318       | 6581     | forward | Functional                  | HuTRAV26         |
| <b>Un.004.2299</b> |                  |            |          |         |                             |                  |
|                    | 241              | 2057       | 2323     | reverse | Functional                  | HuTRAV26         |
|                    | 242              | 9086       | 9352     | reverse | Functional                  | HuTRAV25         |

| Chromosome         | Gene number      | V exon     |          | Strand  | Functional / Pseudo gene |  | Subgroup          |
|--------------------|------------------|------------|----------|---------|--------------------------|--|-------------------|
|                    |                  | Start (bp) | End (bp) |         |                          |  |                   |
| <b>Un.004.2299</b> |                  |            |          |         |                          |  |                   |
|                    | 243              | 16986      | 17264    | reverse | Functional               |  | BoTRDV1           |
| <b>Un.004.2401</b> |                  |            |          |         |                          |  |                   |
|                    | 244              | 5242       | 5514     | forward | Functional               |  | BoTRDV1           |
|                    | 245              | 12781      | 13050    | reverse | Pseudo                   |  | Gene 96 subgroup  |
|                    | 246              | 19332      | 19604    | forward | Functional               |  | BoTRDV1           |
| <b>Un.004.2451</b> |                  |            |          |         |                          |  |                   |
|                    | 247              | 815        | 1093     | forward | Functional               |  | BoTRDV1           |
|                    | 248              | 12212      | 12466    | forward | Functional               |  | HuTRAV23          |
|                    | 249              | 16782      | 17051    | forward | Functional               |  | HuTRAV23          |
| <b>Un.004.2604</b> |                  |            |          |         |                          |  |                   |
|                    | 250              | 10754      | 11020    | reverse | Functional               |  | HuTRAV26          |
| <b>Un.004.2618</b> |                  |            |          |         |                          |  |                   |
|                    | 251              | 4192       | 4470     | forward | Functional               |  | BoTRDV1           |
|                    | 252              | 12445      | 12714    | reverse | Functional               |  | HuTRAV26          |
| <b>Un.004.2678</b> |                  |            |          |         |                          |  |                   |
|                    | 253              | 14036      | 14305    | reverse | Functional               |  | HuTRAV23          |
| <b>Un.004.2725</b> |                  |            |          |         |                          |  |                   |
|                    | 254              | 6349       | 6621     | reverse | Functional               |  | Gene 50 subgroup  |
| <b>Un.004.2788</b> |                  |            |          |         |                          |  |                   |
|                    | 255              | 4573       | 4842     | forward | Pseudo                   |  | HuTRAV8           |
|                    | 256 <sup>b</sup> | 5756       | 6004     | forward | Incomplete               |  | HuTRAV22          |
|                    | 257              | 9665       | 9931     | forward | Functional               |  | BoTRDV1           |
| <b>Un.004.2942</b> |                  |            |          |         |                          |  |                   |
|                    | 258              | 15235      | 15483    | forward | Functional               |  | BoTRDV1           |
| <b>Un.004.3421</b> |                  |            |          |         |                          |  |                   |
|                    | 259 <sup>a</sup> | 13278      | 13472    | reverse | Incomplete               |  | Gene 259 subgroup |
| <b>Un.004.365</b>  |                  |            |          |         |                          |  |                   |
|                    | 260              | 4450       | 4722     | forward | Functional               |  | BoTRDV1           |
|                    | 261              | 5155       | 5424     | forward | Pseudo                   |  | BoTRDV1           |
|                    | 262              | 11011      | 11280    | forward | Functional               |  | HuTRAV24          |
|                    | 263 <sup>b</sup> | 17435      | 17694    | forward | Incomplete               |  | HuTRAV25          |
|                    | BoTRDV1.15       | 19769      | 20041    | forward | Functional               |  | BoTRDV1           |
|                    | 264              | 20485      | 20751    | forward | Functional               |  | HuTRAV25          |
|                    | 265              | 28653      | 28925    | forward | Functional               |  | BoTRDV1           |
|                    | 266              | 41038      | 41304    | forward | Functional               |  | HuTRAV26          |
|                    | 267              | 50488      | 50754    | forward | Functional               |  | BoTRDV1           |
|                    | 268              | 61571      | 61840    | forward | Pseudo                   |  | HuTRAV8           |
|                    | 269              | 62520      | 62780    | forward | Functional               |  | HuTRAV22          |
|                    | 270              | 74297      | 74578    | forward | Functional               |  | BoTRDV1           |
|                    | 271              | 84785      | 85051    | forward | Functional               |  | HuTRAV4           |
|                    | 272              | 94141      | 94410    | forward | Functional               |  | HuTRAV5           |
|                    | 273              | 110341     | 110610   | forward | Functional               |  | HuTRAV9           |
|                    | 274              | 114909     | 115178   | forward | Functional               |  | HuTRAV13          |

| Chromosome         | Gene number      | V exon     |          | Strand  | Functional /<br>Pseudo gene | Subgroup          |
|--------------------|------------------|------------|----------|---------|-----------------------------|-------------------|
|                    |                  | Start (bp) | End (bp) |         |                             |                   |
| <b>Un.004.365</b>  |                  |            |          |         |                             |                   |
|                    | 275              | 120307     | 120582   | forward | Functional                  | HuTRAV14          |
| <b>Un.004.3713</b> |                  |            |          |         |                             |                   |
|                    | 276              | 10688      | 10966    | reverse | Functional                  | BoTRDV1           |
| <b>Un.004.3987</b> |                  |            |          |         |                             |                   |
|                    | 277              | 3386       | 3655     | forward | Functional                  | HuTRAV5           |
| <b>Un.004.4259</b> |                  |            |          |         |                             |                   |
|                    | 278              | 4589       | 4858     | forward | Functional                  | HuTRAV9           |
|                    | 279              | 9721       | 9981     | forward | Functional                  | Gene 82 subgroup  |
| <b>Un.004.4322</b> |                  |            |          |         |                             |                   |
|                    | 280              | 9615       | 9893     | reverse | Functional                  | BoTRDV1           |
| <b>Un.004.4716</b> |                  |            |          |         |                             |                   |
|                    | 281              | 560        | 829      | forward | Functional                  | HuTRAV13          |
|                    | 282              | 6938       | 7213     | forward | Functional                  | HuTRAV14          |
| <b>Un.004.5018</b> |                  |            |          |         |                             |                   |
|                    | 283              | 3039       | 3305     | forward | Pseudo                      | HuTRAV17          |
| <b>Un.004.5412</b> |                  |            |          |         |                             |                   |
|                    | 284 <sup>b</sup> | 3187       | 3318     | forward | Incomplete                  | Gene 284 subgroup |
|                    | 285              | 7618       | 7887     | forward | Functional                  | HuTRAV13          |
| <b>Un.004.5648</b> |                  |            |          |         |                             |                   |
|                    | 286              | 5705       | 5965     | forward | Functional                  | HuTRAV22          |
|                    | 287              | 6645       | 6914     | reverse | Pseudo                      | HuTRAV8           |
| <b>Un.004.6076</b> |                  |            |          |         |                             |                   |
|                    | 288              | 5441       | 5713     | reverse | Functional                  | HuTRAV8           |
| <b>Un.004.6291</b> |                  |            |          |         |                             |                   |
|                    | 289              | 3157       | 3429     | reverse | Functional                  | BoTRDV3           |
| <b>Un.004.6327</b> |                  |            |          |         |                             |                   |
|                    | 290              | 3711       | 3986     | reverse | Functional                  | HuTRAV14          |
| <b>Un.004.64</b>   |                  |            |          |         |                             |                   |
|                    | 291              | 5913       | 6194     | forward | Functional                  | BoTRDV1           |
|                    | 292              | 14991      | 15257    | forward | Functional                  | HuTRAV4           |
|                    | 293              | 26427      | 26696    | forward | Functional                  | HuTRAV5           |
|                    | 294              | 67359      | 67634    | forward | Pseudo                      | HuTRAV14          |
|                    | 295              | 73721      | 73990    | forward | Functional                  | HuTRAV9           |
|                    | 296              | 77975      | 78244    | forward | Functional                  | HuTRAV13          |
|                    | 297              | 83238      | 83513    | forward | Functional                  | HuTRAV14          |
|                    | 298              | 100899     | 101168   | forward | Functional                  | HuTRAV9           |
|                    | 299              | 106032     | 106292   | forward | Functional                  | Gene 82 subgroup  |
|                    | 300              | 110429     | 110698   | forward | Pseudo                      | HuTRAV13          |
|                    | 301              | 114154     | 114429   | forward | Pseudo                      | HuTRAV14          |
|                    | 302              | 124637     | 124906   | forward | Pseudo                      | HuTRAV9           |
|                    | 303              | 132294     | 132563   | forward | Functional                  | HuTRAV10          |

| Chromosome       | Gene number | V exon     |          | Strand  | Functional /<br>Pseudo gene | Subgroup          |
|------------------|-------------|------------|----------|---------|-----------------------------|-------------------|
|                  |             | Start (bp) | End (bp) |         |                             |                   |
| <b>Un.004.64</b> |             |            |          |         |                             |                   |
|                  | 304         | 144667     | 144933   | forward | Functional                  | Gene 54 subgroup  |
|                  | 305         | 215974     | 216240   | forward | Functional                  | HuTRAV18          |
|                  | 306         | 220503     | 220775   | forward | Functional                  | Gene 50 subgroup  |
|                  | 307         | 226192     | 226464   | forward | Functional                  | Gene 50 subgroup  |
|                  | 308         | 237422     | 237694   | forward | Functional                  | Gene 50 subgroup  |
|                  | 309         | 254594     | 254866   | forward | Functional                  | Gene 50 subgroup  |
|                  | 310         | 257074     | 257349   | forward | Functional                  | HuTRAV19          |
|                  | 311         | 266118     | 266375   | forward | Functional                  | HuTRAV20          |
|                  | 312         | 274020     | 274289   | forward | Functional                  | HuTRAV21          |
|                  | 313         | 278758     | 279027   | forward | Functional                  | HuTRAV21          |
|                  | 314         | 282226     | 282498   | forward | Functional                  | HuTRAV8           |
|                  | 315         | 286668     | 286928   | forward | Functional                  | HuTRAV22          |
|                  | 316         | 294064     | 294333   | forward | Functional                  | HuTRAV23          |
|                  | 317         | 300560     | 300841   | forward | Functional                  | BoTRDV1           |
|                  | 318         | 312729     | 312995   | forward | Functional                  | HuTRAV25          |
|                  | 319         | 323111     | 323377   | forward | Functional                  | HuTRAV26          |
|                  | 320         | 326162     | 326422   | forward | Functional                  | HuTRAV22          |
|                  | 321         | 331685     | 331963   | forward | Functional                  | BoTRDV1           |
|                  | 322         | 337265     | 337534   | forward | Pseudo                      | HuTRAV24          |
|                  | 323         | 341892     | 342152   | forward | Functional                  | HuTRAV22          |
|                  | 324         | 347255     | 347541   | forward | Pseudo                      | HuTRAV23          |
|                  | 325         | 351982     | 352260   | forward | Pseudo                      | BoTRDV1           |
|                  | 326         | 359727     | 359993   | forward | Functional                  | HuTRAV25          |
|                  | 327         | 372465     | 372719   | reverse | Functional                  | Gene 327 subgroup |
|                  | 328         | 377707     | 377967   | forward | Functional                  | HuTRAV22          |
|                  | 329         | 386292     | 386550   | forward | Pseudo                      | HuTRAV23          |
|                  | 330         | 391233     | 391514   | forward | Functional                  | BoTRDV1           |
|                  | 331         | 401762     | 402028   | forward | Functional                  | HuTRAV26          |
|                  | 332         | 408430     | 408699   | forward | Functional                  | HuTRAV25          |
|                  | 333         | 414771     | 415043   | forward | Functional                  | BoTRDV1           |
|                  | 334         | 423389     | 423655   | forward | Functional                  | HuTRAV26          |
|                  | 335         | 426400     | 426660   | forward | Functional                  | HuTRAV22          |
|                  | 336         | 435270     | 435536   | forward | Functional                  | HuTRAV26          |
|                  | 337         | 438285     | 438551   | forward | Pseudo                      | HuTRAV22          |
|                  | 338         | 439473     | 439742   | forward | Functional                  | HuTRAV23          |

**Un.004.69**

|  |            |        |        |         |            |                  |
|--|------------|--------|--------|---------|------------|------------------|
|  | 339        | 16733  | 17011  | forward | Functional | BoTRDV1          |
|  | 340        | 22055  | 22321  | forward | Pseudo     | HuTRAV4          |
|  | 341        | 31479  | 31748  | forward | Functional | HuTRAV9          |
|  | 342        | 36131  | 36400  | forward | Functional | HuTRAV13         |
|  | 343        | 41747  | 42010  | forward | Pseudo     | Gene 57 subgroup |
|  | 344        | 42966  | 43235  | forward | Functional | HuTRAV11         |
|  | 345        | 59584  | 59850  | forward | Functional | Gene 54 subgroup |
|  | 346        | 69740  | 70006  | reverse | Pseudo     | HuTRAV4          |
|  | 347        | 75050  | 75328  | reverse | Functional | BoTRDV1          |
|  | 348        | 286504 | 286776 | forward | Functional | Gene 50 subgroup |
|  | 349        | 288677 | 288952 | forward | Functional | HuTRAV19         |
|  | 350        | 297491 | 297757 | forward | Functional | HuTRAV25         |
|  | BoTRDV1.23 | 303827 | 304099 | forward | Functional | BoTRDV1          |
|  | 351        | 315180 | 315452 | forward | Functional | BoTRDV1          |
|  | 352        | 324411 | 324677 | forward | Functional | HuTRAV26         |
|  | 353        | 327421 | 327681 | forward | Functional | HuTRAV22         |



| Chromosome         | Gene number | V exon     |          | Strand  | Functional /<br>Pseudo gene | Subgroup          |
|--------------------|-------------|------------|----------|---------|-----------------------------|-------------------|
|                    |             | Start (bp) | End (bp) |         |                             |                   |
| <b>Un.004.69</b>   |             |            |          |         |                             |                   |
|                    | 354         | 328604     | 328873   | forward | Pseudo                      | HuTRAV23          |
|                    | 355         | 341279     | 341557   | forward | Pseudo                      | BoTRDV1           |
|                    | 356         | 346700     | 346969   | forward | Pseudo                      | Gene 356 subgroup |
|                    | 357         | 351794     | 352063   | forward | Pseudo                      | HuTRAV23          |
|                    | BoTRDV1.27  | 356855     | 357133   | forward | Functional                  | BoTRDV1           |
|                    | 358         | 373578     | 373823   | forward | Functional                  | BoTRDV1           |
|                    | 359         | 382770     | 383036   | forward | Functional                  | HuTRAV26          |
|                    | 360         | 390362     | 390631   | forward | Functional                  | HuTRAV26          |
|                    | 361         | 398036     | 398305   | forward | Functional                  | HuTRAV24          |
|                    | 362         | 404696     | 404962   | forward | Functional                  | HuTRAV25          |
|                    | 363         | 415688     | 415954   | forward | Functional                  | HuTRAV26          |
|                    | 364         | 425989     | 426261   | forward | Functional                  | HuTRAV8           |
| <b>Un.004.7141</b> |             |            |          |         |                             |                   |
|                    | 365         | 1925       | 2191     | reverse | Functional                  | Gene 54 subgroup  |
| <b>Un.004.835</b>  |             |            |          |         |                             |                   |
|                    | 366         | 8556       | 8828     | reverse | Functional                  | Gene 50 subgroup  |
|                    | 367         | 15298      | 15570    | reverse | Functional                  | Gene 50 subgroup  |
|                    | 368         | 21007      | 21279    | reverse | Functional                  | Gene 50 subgroup  |
|                    | 369         | 25545      | 25811    | reverse | Functional                  | HuTRAV18          |
|                    | 370         | 38602      | 38868    | reverse | Pseudo                      | HuTRAV17          |
|                    | 371         | 44671      | 44931    | reverse | Functional                  | HuTRAV16          |
|                    | 372         | 62945      | 63211    | reverse | Functional                  | Gene 54 subgroup  |
| <b>Un.004.885</b>  |             |            |          |         |                             |                   |
|                    | 373         | 9746       | 10015    | reverse | Pseudo                      | HuTRAV23          |
|                    | 374         | 10943      | 11203    | reverse | Functional                  | HuTRAV22          |
|                    | 375         | 21957      | 22229    | reverse | Functional                  | BoTRDV1           |
|                    | 376         | 28475      | 28741    | reverse | Functional                  | HuTRAV25          |
|                    | 377         | 32728      | 32994    | reverse | Functional                  | HuTRAV26          |
|                    | 378         | 40080      | 40349    | reverse | Pseudo                      | HuTRAV23          |
|                    | 379         | 41270      | 41530    | reverse | Functional                  | HuTRAV22          |
|                    | 380         | 47792      | 48055    | reverse | Functional                  | HuTRAV26          |
|                    | 381         | 58042      | 58314    | reverse | Functional                  | BoTRDV1           |
| <b>Un.004.8934</b> |             |            |          |         |                             |                   |
|                    | 382         | 1857       | 2135     | reverse | Functional                  | BoTRDV1           |
| <b>Un.004.977</b>  |             |            |          |         |                             |                   |
|                    | 383         | 7448       | 7714     | reverse | Pseudo                      | HuTRAV26          |
|                    | 384         | 17390      | 17656    | reverse | Functional                  | HuTRAV36          |
|                    | 385         | 30817      | 31098    | reverse | Pseudo                      | Gene 385 subgroup |
|                    | 386         | 34430      | 34690    | forward | Functional                  | HuTRAV28          |
|                    | 387         | 40729      | 40998    | forward | Functional                  | HuTRAV29          |
|                    | BoTRDV2.2   | 44222      | 44494    | forward | Functional                  | BoTRDV2           |
|                    | 388         | 48977      | 49252    | forward | Functional                  | HuTRAV38          |
